# Supplementary material for: Comparative Genomic Analysis of SAUR Gene Family, Cloning and Functional Characterization of Two Genes (PbrSAUR13 and PbrSAUR52) in Pyrus bretschneideri
Source: MDPI journal article supplement (doi:10.3390/ijms23137054), 2022-06-24
Supplement: s1 [file s1]

Motif 1

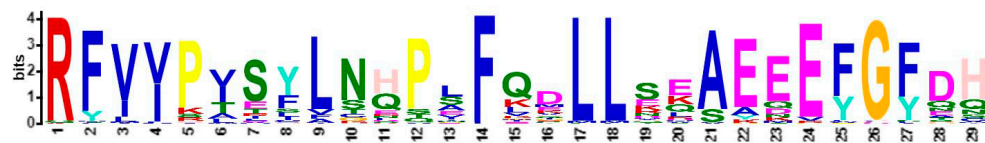

Motif 2

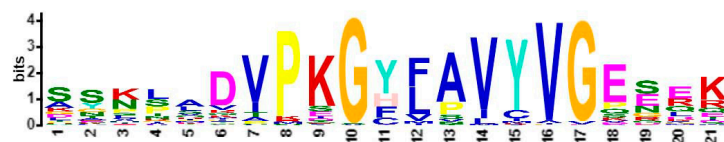

Motif 3

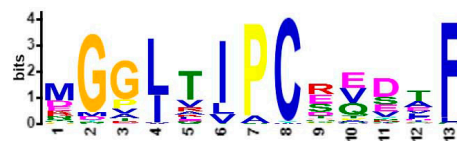

Motif 4

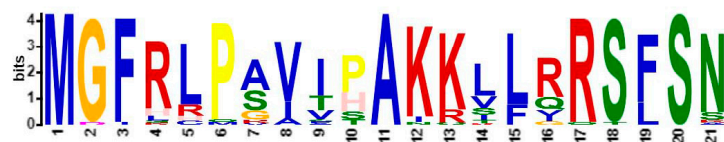

Motif 5

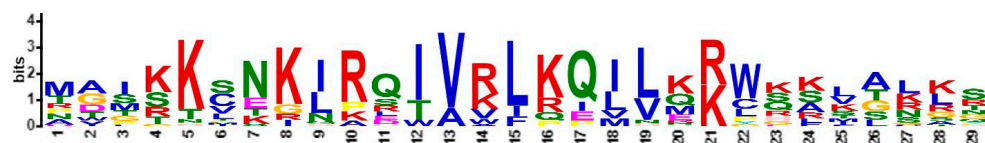

Figure S1. Conserved motif composition

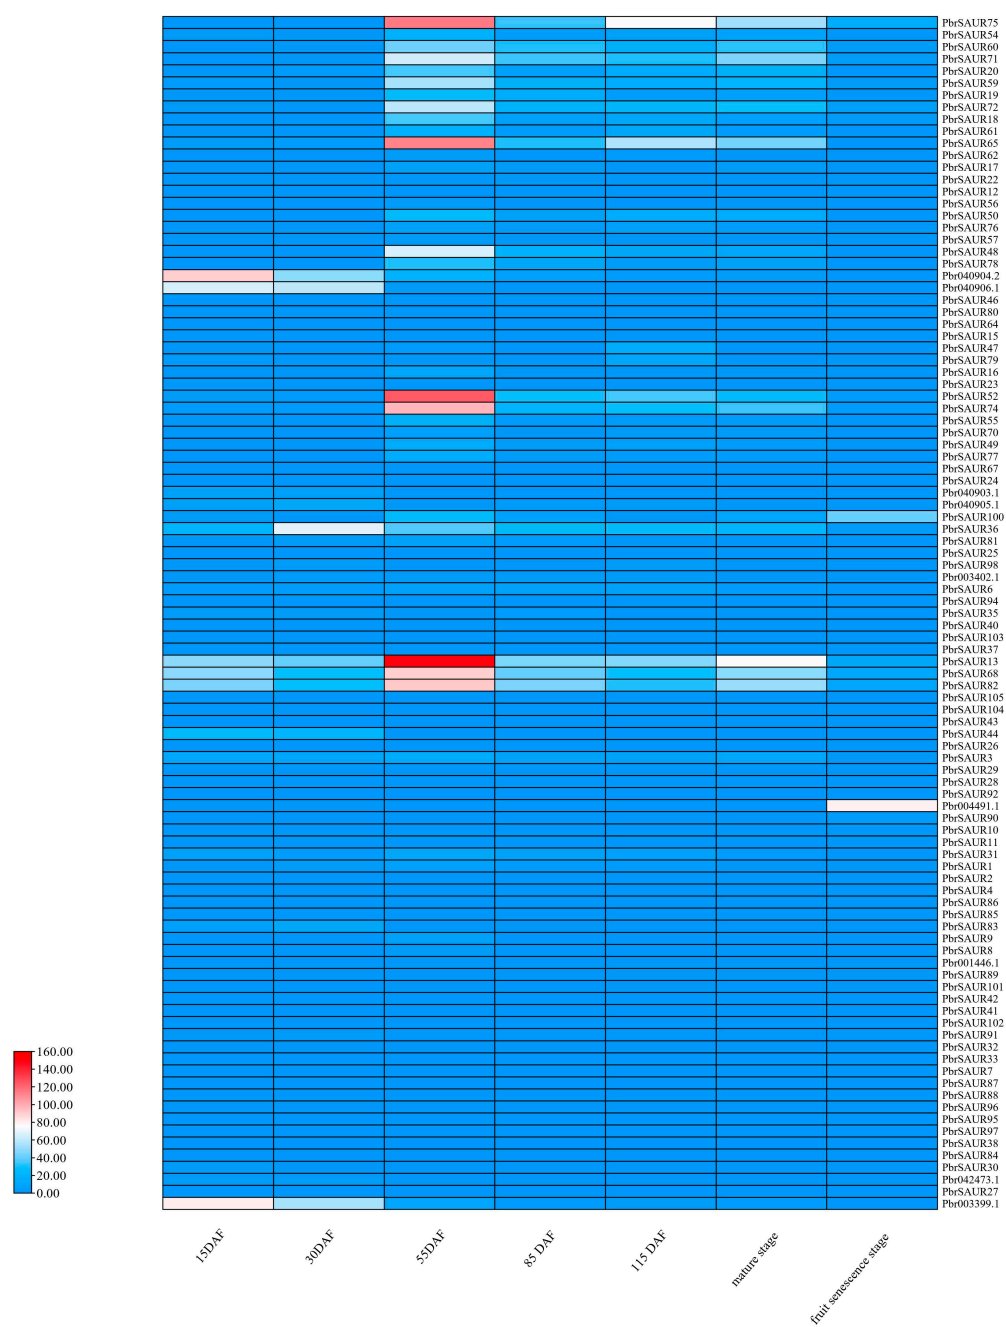

**Figure S2.** Expression patterns of *PbrSAUR* gene family at different developmental stages
